# Supplementary material for: Concentrated ambient PM2.5 exposure affects mice sperm quality and testosterone biosynthesis
Source: PeerJ. 2019 Nov 28;7:e8109. doi: 10.7717/peerj.8109 (PMC6885350; doi:10.7717/peerj.8109)
Supplement: Supplemental Information 2 [file peerj-07-8109-s002.xlsx]

## Sheet: sperm parameters
Number	Group	DFI (%)	HDS (%)	Sperm concentration(*10000000)	PR(%)	PR+NP (%)	Body weight(g)	Testis weight (g)	Relative weight (%)	Testo (ng/ml)	Abnormal sperm percent(%)
1	FA	4.1	1.06	52.7	69.1	87.3	30.05	0.2612	0.7718	0.86	32.5
2	FA	4.26	0.97	52.8	56.5	81.6	26.9	0.2374	0.7698	0.75	27.06
3	FA	1.55	0.78	36.7	62.3	83.3	27.47	0.2684	0.798	0.64	28.63
4	FA	3.47	0.97	25.5	61.8	81.9	28.79	0.2384	0.9106	0.59	17
5	FA	2.42	1.04	49.5	62.7	83.2	28.01	0.2284	0.8444	0.61	19.5
6	FA	1.96	0.6	40.8	69.1	86.7	27.07	0.2236	0.9143	0.69	21.5
7	CAP	7.31	2.55	25.5	55.2	77.1	30.06	0.232	0.8692	0.42	38.5
8	CAP	3.35	1.63	27.6	50	74	28.45	0.219	0.8825	0.254	41
9	CAP	4.71	1.86	23.4	52.9	74.2	29.95	0.239	0.9771	0.152	45
10	CAP	4.32	1.31	23.3	55	76.4	26.07	0.2374	0.8281	0.34	43
11	CAP	3.64	1.11	11.5	56.3	78	28.02	0.2366	0.8154	0.197	49
12	CAP	3.02	0.63	40.7	61.5	82.8	27.08	0.2476	0.826	0.29	52.5
