# Supplementary material for: Concentrated ambient PM2.5 exposure affects mice sperm quality and testosterone biosynthesis
Source: PeerJ. 2019 Nov 28;7:e8109. doi: 10.7717/peerj.8109 (PMC6885350; doi:10.7717/peerj.8109)
Supplement: Supplemental Information 3 [file peerj-07-8109-s003.xlsx]

## Sheet: mRNA expression
group	17BHSD	3BHSD	AR	P450 arom	ER	FSHR	P450SCC	STAR
PM	0.964227	0.768497	1.10335	0.844076	0.746792	0.668294	0.554102	0.47132
PM	0.982442	0.75216	1.13673	0.713233	0.689574	0.843556	0.596346	0.426547
PM	0.931382	0.744896	0.792174	0.800761	0.675383	0.641515	0.522036	0.504798
PM	0.991335	0.792845	0.859095	0.942422	0.721353	0.827342	0.873102	0.480223
PM	1.04859	0.894474	1.07169	0.702439	0.945912	0.962298	0.786884	0.555084
PM	1.09843	0.929232	0.744781	0.72721	0.969141	0.86487	0.937716	0.598785
PM	0.504798	1.11841	0.708197	0.620618	0.751118	0.804346	0.456142	0.52965
PM	0.475916	1.10607	0.746504	0.891173	0.714057	0.86148	0.455826	0.511963
PM	0.479558	1.11996	0.603415	0.840184	0.780847	0.841415	0.490919	0.620762
FA	0.747655	0.752681	0.823528	1.14508	1.00262	0.618804	0.629476	1.12567
FA	0.835345	0.729566	0.751002	1.16267	0.750424	0.674343	0.710655	1.14059
FA	0.839408	0.805586	1.11953	0.989276	0.904867	0.829639	0.69603	1.04447
FA	0.937643	0.935479	1.91661	0.915804	1.32633	1.13857	1.12263	0.673357
FA	1.0921	1.35922	1.02708	1.01333	1.12853	1.35964	1.15901	0.774558
FA	1.34361	1.24124	1.09093	0.834574	1.07583	1.43318	1.31758	0.92559
FA	1.17673	1.1427	1.2127	0.969141	1.07782	1.06798	2.89498	1.13612
FA	1.10097	1.15144	0.741862	1.03726	0.912636	1.1281	0.778925	1.15919
FA	1.07012	1.08858	0.74754	0.975205	0.927302	1.08064	0.83079	1.17293
